# Supplementary material for: A microfluidic “baby machine” for cell synchronization
Source: Royal Society of Chemistry journal article supplement (doi:10.1039/c2lc40277g), 2012-01-01
Supplement: c2lc40277g.pdf [file c2lc40277g.pdf]

**Supplemental movie.** L1210 cells growing and dividing in the microfluidic "baby machine," while releasing newborn cells. The fluid flow is from left to right. In this video, one frame was acquired every 5 minutes for a total elapsed time of 12.2 hours. The video is sped up 1800x.
